# Supplementary material for: Target, suspect and non-target screening analysis from wastewater treatment plant effluents to drinking water using collision cross section values as additional identification criterion
Source: PubMed Central journal article supplement (PMC8748347; doi:10.1007/s00216-021-03263-1), 2021-03-25
Supplement: 216_2021_3263_MOESM1_ESM.pdf [file 216_2021_3263_MOESM1_ESM.pdf]

## Supplementary Information

### **Target, suspect and non-target screening analysis from wastewater treatment plant effluents to drinking water using collision cross section values as additional identification criterion**

Vanessa Hinnenkamp<sup>1</sup>, Peter Balsaa<sup>1</sup>, Torsten C. Schmidt<sup>1,2\*</sup>

<sup>1</sup> IWW Water Centre, Moritzstraße 26, 45476 Muelheim an der Ruhr, Germany

<sup>2</sup> Instrumental Analytical Chemistry and Centre for Water and Environmental Research (ZWU), Universitaetsstrasse 5, 45141 Essen, Germany

\*Corresponding Author: Torsten C. Schmidt, Universitaetsstr. 5, 45141 Essen, Germany, e-

mail [torsten.schmidt@uni-due.de](mailto:torsten.schmidt@uni-due.de), ORCID: 0000-0003-1107-4403

## Additional tables and figures

Table S1. LC-HRMS data for the internal standards used for ESI+ mode measurements.

| <b>Substance</b>     | <b>RT<br/>[min]</b> | <b>Adduct</b>      | <b>CCS<br/>[Å<sup>2</sup>]</b> | <b>Fragment<br/>ion 1</b> | <b>Fragment<br/>ion 2</b> | <b>Fragment<br/>ion 3</b> | <b>Fragment<br/>ion 4</b> |
|----------------------|---------------------|--------------------|--------------------------------|---------------------------|---------------------------|---------------------------|---------------------------|
| Atrazine-d5          | 10.14               | [M+H] <sup>+</sup> | 151.9                          | 179.0857                  | 147.0293                  | 137.0639                  | 101.0873                  |
| Desethyl atrazine-d6 | 7.89                | [M+H] <sup>+</sup> | 142.4                          | 147.0292                  | 111.0525                  | 105.0074                  |                           |
| Diclofenac-d4        | 11.76               | [M+H] <sup>+</sup> | 158.7                          | 218.0671                  | 254.0435                  | 183.0982                  |                           |
| Diuron-d6            | 10.26               | [M+H] <sup>+</sup> | 150.2                          | 187.9668                  | 159.9719                  | 132.9609                  |                           |
| Methamidophos-d6     | 3.75                | [M+H] <sup>+</sup> | 124.3                          | 131.0198                  | 97.0242                   |                           |                           |
| Pendimethalin-d5     | 13.64               | [M+H] <sup>+</sup> | 160.2                          | 213.0727                  | 194.0563                  |                           |                           |

Table S2. LC-HRMS data for the internal standards used for ESI- mode measurements.

| <b>Substance</b>   | <b>RT<br/>[min]</b> | <b>Adduct</b>      | <b>CCS<br/>[Å<sup>2</sup>]</b> | <b>Fragment<br/>ion 1</b> | <b>Fragment<br/>ion 2</b> | <b>Fragment<br/>ion 3</b> |
|--------------------|---------------------|--------------------|--------------------------------|---------------------------|---------------------------|---------------------------|
| Acesulfame-d4      | 3.61                | [M-H] <sup>-</sup> | 124.4                          | 86.0552                   |                           |                           |
| Chloramphenicol-d5 | 7.97                | [M-H] <sup>-</sup> | 166.6                          | 157.0668                  | 262.0654                  | 126.0610                  |
| Diclofenac-d4      | 11.77               | [M-H] <sup>-</sup> | 162.8                          | 249.1499                  | 205.1595                  | 193.1008                  |
| Diuron-d6          | 10.27               | [M-H] <sup>-</sup> | 147.8                          | 185.9523                  | 149.9755                  |                           |

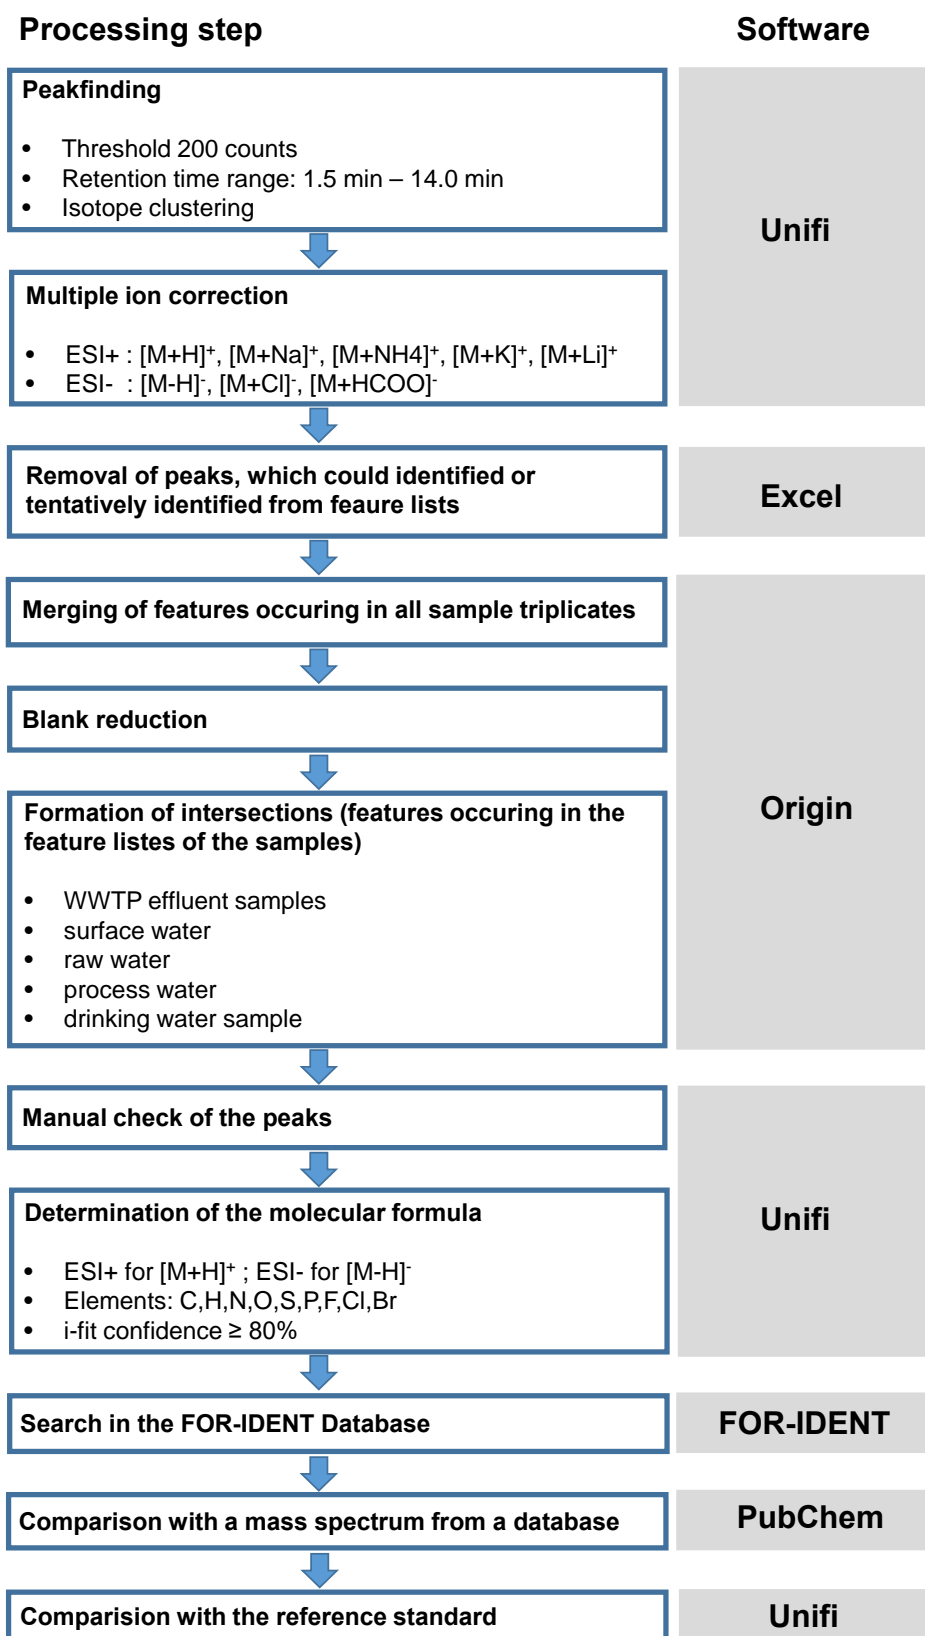

Figure S1. Depiction of the non-target screening analysis workflow.



| Analytes                           | CAS number<br>or<br>InChi Key   | Drinking<br>water | Process<br>water | Raw<br>water | Surface<br>water | WWTP<br>effluent 1 | WWTP<br>effluent 2 |
|------------------------------------|---------------------------------|-------------------|------------------|--------------|------------------|--------------------|--------------------|
| Chlortoluron                       | 15545-48-9                      | n.d.              | n.d.             | n.d.         | n.d.             | n.d.               | n.d.               |
| Ciprofloxacin                      | 85721-33-1                      | n.d.              | n.d.             | n.d.         | n.d.             |                    | n.d.               |
| Clarithromycin                     | 81103-11-9                      | n.d.              |                  |              |                  |                    |                    |
| Desethyl atrazine                  | 6190-65-4                       | n.d.              | n.d.             | n.d.         | n.d.             | n.d.               | n.d.               |
| Desethyl terbuthylazine            | 30125-63-4                      | n.d.              | n.d.             | n.d.         | n.d.             | n.d.               | n.d.               |
| Desisopropyl atrazine              | 1007-28-9                       |                   |                  |              | n.d.             | n.d.               | n.d.               |
| Desphenyl-chloridazon              | 6339-19-1                       | n.d.              | n.d.             | n.d.         |                  | n.d.               | n.d.               |
| Diatrizoic acid                    | 177-96-4                        |                   |                  |              |                  |                    | n.d.               |
| Diclofenac                         | 15307-86-5                      | n.d.              | n.d.             | n.d.         |                  |                    |                    |
| Diethyltoluamide (DEET)            | 134-62-3                        |                   |                  |              |                  |                    |                    |
| Diflufenican                       | 83164-33-4                      | n.d.              | n.d.             | n.d.         | n.d.             | n.d.               | n.d.               |
| Dimethachlor-CGA369873             | 1418095-08-5                    | n.d.              | n.d.             | n.d.         | n.d.             | n.d.               | n.d.               |
| Dimethenamid                       | 87674-68-8                      | n.d.              | n.d.             | n.d.         | n.d.             | n.d.               | n.d.               |
| Dimethenamid-OA                    | 380412-59-9                     | n.d.              | n.d.             | n.d.         | n.d.             | n.d.               | n.d.               |
| Dimoxystrobin-505 M08 <sup>t</sup> | VVBFFEYXSJKVET-<br>HEHNFIMWSA-N | n.d.              | n.d.             | n.d.         | n.d.             | n.d.               | n.d.               |
| Dimoxystrobin-505 M09 <sup>t</sup> | RKECPZYSBKSRJM-<br>HEHNFIMWSA-N | n.d.              | n.d.             | n.d.         | n.d.             | n.d.               | n.d.               |
| Dinoseb                            | 88-85-7                         | n.d.              | n.d.             | n.d.         | n.d.             | n.d.               | n.d.               |
| Dinoterb                           | 1420-07-1                       | n.d.              | n.d.             | n.d.         | n.d.             | n.d.               | n.d.               |
| Diuron                             | 330-54-1                        | n.d.              | n.d.             | n.d.         | n.d.             | n.d.               | n.d.               |
| Epoxiconazole                      | 133855-98-8                     | n.d.              | n.d.             | n.d.         | n.d.             | n.d.               | n.d.               |
| Eprosartan                         | 133040-01-4                     | n.d.              | n.d.             | n.d.         | n.d.             |                    |                    |
| Ethidimuron                        | 30043-49-3                      | n.d.              | n.d.             | n.d.         | n.d.             | n.d.               | n.d.               |
| Flufenacet                         | 142459-58-3                     | n.d.              | n.d.             | n.d.         | n.d.             | n.d.               | n.d.               |
| Flufenacet-ESA                     | 947601-87-8                     | n.d.              | n.d.             | n.d.         | n.d.             | n.d.               | n.d.               |
| Fluroxypyr                         | 69377-81-7                      | n.d.              | n.d.             | n.d.         | n.d.             | n.d.               | n.d.               |
| Flurtamone                         | 96525-23-4                      | n.d.              | n.d.             | n.d.         | n.d.             | n.d.               | n.d.               |
| Gabapentin                         | 60142-96-3                      |                   |                  |              |                  |                    |                    |
| Gabapentin-lactam                  | 64744-50-9                      |                   |                  |              |                  |                    |                    |
| Glibenclamide                      | 10238-21-8                      | n.d.              | n.d.             | n.d.         | n.d.             | n.d.               | n.d.               |
| Hexazinone                         | 51235-04-2                      | n.d.              | n.d.             | n.d.         | n.d.             | n.d.               | n.d.               |
| Imidacloprid                       | 138261-41-3                     | n.d.              | n.d.             | n.d.         | n.d.             | n.d.               | n.d.               |
| Indometacin                        | 53-86-1                         | n.d.              | n.d.             | n.d.         | n.d.             | n.d.               | n.d.               |
| Iodosulfuron-methyl                | 185119-76-0                     | n.d.              | n.d.             | n.d.         | n.d.             | n.d.               | n.d.               |
| Iohexol                            | 66108-95-0                      | n.d.              | n.d.             | n.d.         |                  | n.d.               | n.d.               |
| Iomeprol                           | 78649-41-9                      | n.d.              | n.d.             | n.d.         |                  | n.d.               |                    |
| Iopamidol                          | 60166-93-0                      |                   |                  |              |                  |                    | n.d.               |
| Iopromide                          | 73334-07-3                      | n.d.              | n.d.             | n.d.         |                  |                    |                    |
| Ioversol                           | 87771-40-2                      | n.d.              | n.d.             | n.d.         | n.d.             | n.d.               | n.d.               |
| Ioxithalamin acid                  | 28179-44-4                      | n.d.              | n.d.             | n.d.         | n.d.             | n.d.               | n.d.               |
| Ioxynil                            | 1689-83-4                       | n.d.              | n.d.             | n.d.         | n.d.             | n.d.               | n.d.               |
| Irbesartan                         | 138402-11-6                     |                   |                  |              |                  |                    |                    |

| Analytes                        | CAS number<br>or<br>InChi Key   | Drinking<br>water | Process<br>water | Raw<br>water | Surface<br>water | WWTP<br>effluent 1 | WWTP<br>effluent 2 |
|---------------------------------|---------------------------------|-------------------|------------------|--------------|------------------|--------------------|--------------------|
| Irgarol                         | 28159-98-0                      | n.d.              | n.d.             | n.d.         | n.d.             | n.d.               | n.d.               |
| Isoproturon                     | 34123-59-6                      | n.d.              | n.d.             | n.d.         | n.d.             | n.d.               | n.d.               |
| Karbutilate                     | 4849-32-5                       | n.d.              | n.d.             | n.d.         | n.d.             | n.d.               | n.d.               |
| Ketoprofen                      | 22071-15-4                      | n.d.              | n.d.             | n.d.         | n.d.             |                    |                    |
| Lamotrigine                     | 84057-84-1                      |                   |                  |              |                  |                    |                    |
| Lenacil                         | 2164-08-1                       | n.d.              | n.d.             | n.d.         | n.d.             | n.d.               | n.d.               |
| Linuron                         | 330-55-2                        | n.d.              | n.d.             | n.d.         | n.d.             | n.d.               | n.d.               |
| Losartan                        | 114798-26-4                     | n.d.              | n.d.             | n.d.         |                  |                    |                    |
| Metalaxyl                       | 57837-19-1                      | n.d.              | n.d.             | n.d.         | n.d.             | n.d.               | n.d.               |
| Metalaxyl -CGA108906            | 104390-56-9                     | n.d.              | n.d.             | n.d.         | n.d.             | n.d.               | n.d.               |
| Metalaxyl-CGA62826              | 87764-37-2                      | n.d.              | n.d.             | n.d.         | n.d.             | n.d.               | n.d.               |
| Metamitron                      | 41394-05-2                      | n.d.              | n.d.             | n.d.         | n.d.             | n.d.               | n.d.               |
| Metazachlor                     | 67129-08-2                      | n.d.              | n.d.             | n.d.         | n.d.             | n.d.               | n.d.               |
| Metazachlor-BH-479-11           | 1242182-77-9                    | n.d.              | n.d.             | n.d.         | n.d.             | n.d.               | n.d.               |
| Metazachlor-BH-479-9            | 1246215-97-3                    | n.d.              | n.d.             | n.d.         | n.d.             | n.d.               | n.d.               |
| Methabenzthiazuron              | 18691-97-9                      | n.d.              | n.d.             | n.d.         | n.d.             | n.d.               | n.d.               |
| Methyl-desphenyl-chloridazon    | 17254-80-7                      |                   |                  |              |                  | n.d.               | n.d.               |
| Metolachlor                     | 51218-45-2                      | n.d.              | n.d.             | n.d.         | n.d.             | n.d.               | n.d.               |
| Metoprolol                      | 37350-58-6                      |                   |                  |              |                  |                    |                    |
| Metribuzin                      | 21087-64-9                      | n.d.              | n.d.             | n.d.         | n.d.             | n.d.               |                    |
| Monolinuron                     | 1746-81-2                       | n.d.              | n.d.             | n.d.         | n.d.             | n.d.               | n.d.               |
| N4-Acetylsulfamethoxazole       | 21312-10-7                      | n.d.              | n.d.             | n.d.         | n.d.             | n.d.               | n.d.               |
| Napropamide                     | 15299-99-7                      | n.d.              | n.d.             | n.d.         | n.d.             | n.d.               | n.d.               |
| Nicosulfuron                    | 111991-09-4                     | n.d.              | n.d.             | n.d.         | n.d.             | n.d.               |                    |
| Olmesartan                      | 144689-63-4                     | n.d.              | n.d.             | n.d.         |                  |                    |                    |
| Oxazepam                        | 604-75-1                        | n.d.              | n.d.             | n.d.         |                  |                    |                    |
| Paracetamol                     | 103-90-2                        | n.d.              | n.d.             | n.d.         | n.d.             | n.d.               | n.d.               |
| Pentoxifylline                  | 6493-05-6                       | n.d.              | n.d.             | n.d.         | n.d.             | n.d.               | n.d.               |
| Phenacetin                      | 62-44-2                         | n.d.              | n.d.             | n.d.         | n.d.             |                    | n.d.               |
| Phenazone                       | 60-80-0                         | n.d.              | n.d.             |              |                  |                    |                    |
| Phenobarbital                   | 50-06-6                         | n.d.              | n.d.             | n.d.         | n.d.             | n.d.               | n.d.               |
| Picolinafen                     | 137641-05-5                     |                   |                  | n.d.         |                  | n.d.               | n.d.               |
| Pindolol                        | 13523-86-9                      | n.d.              | n.d.             | n.d.         | n.d.             | n.d.               | n.d.               |
| Propachlor                      | 1918-16-7                       | n.d.              | n.d.             |              | n.d.             | n.d.               | n.d.               |
| Propiconazole                   | 60207-90-1                      | n.d.              | n.d.             | n.d.         | n.d.             |                    | n.d.               |
| Propranolol                     | 525-66-6                        | n.d.              | n.d.             | n.d.         |                  |                    |                    |
| p-Toluolsulfonamide             | 70-55-3                         | n.d.              | n.d.             | n.d.         | n.d.             | n.d.               | n.d.               |
| Pyraclostrobin                  | 175013-18-0                     | n.d.              | n.d.             | n.d.         | n.d.             | n.d.               | n.d.               |
| Quinmerac                       | 90717-03-6                      | n.d.              | n.d.             | n.d.         | n.d.             | n.d.               | n.d.               |
| Quinmerac-BH 518-2 <sup>t</sup> | ZYIDIAPHYHJMCU-<br>UHFFFAOYSA-N | n.d.              | n.d.             | n.d.         | n.d.             | n.d.               | n.d.               |
| Ritalinic acid                  | 113-45-1                        |                   |                  |              | n.d.             | n.d.               |                    |

| Analytes                            | CAS number or InChi Key     | Drinking water | Process water | Raw water | Surface water | WWTP effluent 1 | WWTP effluent 2 |
|-------------------------------------|-----------------------------|----------------|---------------|-----------|---------------|-----------------|-----------------|
| Saccharin                           | 81-07-2                     |                |               |           |               |                 |                 |
| Salicylic acid                      | 69-72-7                     | n.d.           | n.d.          | n.d.      | n.d.          | n.d.            | n.d.            |
| Simazine                            | 122-34-9                    | n.d.           | n.d.          | n.d.      | n.d.          | n.d.            | n.d.            |
| Simvastatin                         | 79902-63-9                  | n.d.           | n.d.          | n.d.      | n.d.          | n.d.            | n.d.            |
| Sitagliptin                         | 486460-32-6                 |                |               |           |               |                 |                 |
| S-Metolachlor-CGA368208             | 1173021-76-5                | n.d.           | n.d.          | n.d.      | n.d.          | n.d.            | n.d.            |
| S-Metolachlor-CGA380168             | 171118-09-5                 | n.d.           |               |           | n.d.          | n.d.            | n.d.            |
| S-Metolachlor-CGA50267              | 82508-03-0                  | n.d.           | n.d.          | n.d.      | n.d.          | n.d.            | n.d.            |
| S-Metolachlor-NOA413173             | 1418095-19-8                | n.d.           |               | n.d.      | n.d.          | n.d.            | n.d.            |
| Sotalol                             | 3930-20-9                   | n.d.           | n.d.          | n.d.      |               |                 | n.d.            |
| Sucralose                           | 56038-13-2                  |                |               |           |               |                 |                 |
| Sulcotrione                         | 99105-77-8                  | n.d.           | n.d.          | n.d.      | n.d.          | n.d.            | n.d.            |
| Sulfadiazine                        | 68-35-9                     | n.d.           | n.d.          | n.d.      | n.d.          | n.d.            | n.d.            |
| Sulfamethoxazole                    | 723-46-6                    | n.d.           |               |           |               |                 | n.d.            |
| Tebuconazole                        | 107534-96-3                 | n.d.           | n.d.          | n.d.      | n.d.          | n.d.            | n.d.            |
| Telmisartan                         | 144701-48-4                 |                |               | n.d.      |               |                 |                 |
| Terbutryn                           | 886-50-0                    | n.d.           | n.d.          |           |               |                 | n.d.            |
| Tetraethylene glycol dimethyl ether | 143-24-8                    | n.d.           | n.d.          | n.d.      | n.d.          | n.d.            | n.d.            |
| Tolbutamide                         | 64-77-7                     | n.d.           | n.d.          | n.d.      | n.d.          | n.d.            | n.d.            |
| Tramadol                            | 27203-92-5                  | n.d.           |               |           |               |                 |                 |
| Triadimenol                         | 55219-65-3                  | n.d.           | n.d.          | n.d.      | n.d.          | n.d.            | n.d.            |
| Trimethoprim                        | 738-70-5                    | n.d.           | n.d.          | n.d.      | n.d.          |                 |                 |
| Tritosulfuron-BH635-4 <sup>†</sup>  | WBSGOTBBRAWAJI-UHFFFAOYSA-N | n.d.           | n.d.          | n.d.      | n.d.          | n.d.            | n.d.            |
| Valsartan                           | 137862-53-4                 | n.d.           |               |           |               |                 |                 |
| Valsartan acid                      | 164265-78-5                 |                |               |           |               |                 |                 |
| Venlafaxine                         | 93413-69-5                  | n.d.           |               |           |               |                 |                 |

<sup>†</sup> Substances for which CAS numbers were not available. Therefore, the InChi Key is given instead.

Table S4. Outcome of the suspect screening, including substance name, classification, the database which revealed the match, thereby 1 means the database obtained from Wode et al. [1], 2 means the pesticide database from Waters and 3 means the in-house data base. Ident. status means the identification status, whereby i means identified and t means tentatively identified. The *m/z* value, retention time and CCS value were obtained from the first triplicate of the WWTP effluent 1 sample.

| Substance                   | Classification         | Data base | Ident. Status | <i>m/z</i>             | RT                 | CCS                 | Response value | Response value | Response value | Response value | Response value  | Response value  |
|-----------------------------|------------------------|-----------|---------------|------------------------|--------------------|---------------------|----------------|----------------|----------------|----------------|-----------------|-----------------|
|                             |                        |           |               |                        | [min]              | [Å <sup>2</sup> ]   | Drinking water | Process water  | Raw water      | Surface water  | WWTP effluent 1 | WWTP effluent 2 |
| Flecainide                  | pharmaceutical         | 1         | i             | 415.1454               | 8.9                | 192.4               | 545            | -              | 781            | 9645           | 64314           | 166304          |
| Tiapride                    | pharmaceutical         | 1         | t             | 329.1533               | 5.39               | 183.4               | -              | 98             | 104            | 1166           | 24888           | -               |
| Amisulpride                 | pharmaceutical         | 1         | i             | 370.1795               | 6.24               | 192.5               | -              | -              | -              | 513            | 22320           | 9888            |
| Clindamycin                 | pharmaceutical         | 1         | i             | 425.187                | 8.93               | 201.9               | -              | -              | -              | 1983           | 2111            | 5352            |
| Fenoterol                   | pharmaceutical         | 1         | t             | 304.1554               | 5.35               | 168.8               | -              | -              | -              | 280            | 2124            | 3016            |
| Fexofenadine                | pharmaceutical         | 1         | i             | 502.295                | 9.86               | 226.5               | -              | -              | -              | 5553           | 40634           | 83680           |
| Melamine                    | industrial chemical    | 1,3       | i             | 127.0729               | 1.23               | 124.2               | -              | -              | -              | 3625           | 3625            | 5736            |
| Oxcarbazepine               | pharmaceutical         | 1         | t             | 253.0971               | 9.14               | 154.6               | -              | -              | -              | 1056           | 5600            | 9448            |
| Sulfapyridine               | pharmaceutical         | 1         | t             | 250.0654               | 5.74               | 152.9               | -              | -              | -              | 666            | 5355            | -               |
| Sulpiride                   | pharmaceutical         | 1         | i             | 342.149                | 4.98               | 184.7               | -              | -              | -              | 1767           | 19453           | 9075            |
| Tapentadol                  | pharmaceutical         | 1         | t             | 222.1856               | 7.55               | 152.2               | -              | -              | -              | 1330           | 34845           | 11172           |
| Torasemide                  | pharmaceutical         | 1         | t             | 349.1332               | 9.1                | 187.3               | -              | -              | -              | 1144           | 7756            | 8640            |
| Celiprolol                  | pharmaceutical         | 1         | t             | 380.2544               | 7.98               | 204.7               | -              | -              | -              | 2764           | 17573           | 57666           |
| Alprenolol                  | pesticide              | 1         | t*            | 250.18 <sup>†1</sup>   | 7.38 <sup>†1</sup> | 166.8 <sup>†1</sup> | -              | -              | -              | 155            | -               | 1274            |
| 2-(Methylthio)benzothiazole | industrial chemical    | 1         | t             | 182.009                | 11.23              | 132.6               | -              | -              | -              | -              | 439             | 339             |
| Amitriptyline               | pharmaceutical         | 1         | t             | 278.1903               | 10.02              | 166.8               | -              | -              | -              | -              | 15567           | 21841           |
| Bisnortilidine              | metabolite of tilidine | 1         | t             | 246.1489               | 7.96               | 156                 | -              | -              | -              | -              | 612             | 545             |
| Carbaryl                    | pesticide              | 1         | t             | 202.0867 <sup>†1</sup> | 7.09 <sup>†1</sup> | 142.7 <sup>†1</sup> | -              | -              | -              | -              | -               | -               |
| Cetirizine                  | pharmaceutical         | 1         | t             | 389.1624               | 10.36              | 200.3               | -              | -              | -              | -              | 3774            | 3569            |
| Citalopram                  | pharmaceutical         | 1         | t             | 325.1711               | 8.82               | 180.1               | -              | -              | -              | -              | 27005           | 41842           |
| Climbazole                  | pharmaceutical         | 1         | t             | 293.1054               | 9.92               | 170.8               | -              | -              | -              | -              | 3094            | 2512            |
| Clopidogrel                 | pharmaceutical         | 1         | t             | 322.0662               | 11.59              | 168.1               | -              | -              | -              | -              | 2923            | 1842            |
| Doxepine                    | pharmaceutical         | 1         | t             | 280.1697               | 9.06               | 163.5               | -              | -              | -              | -              | 9893            | 7109            |



| Substance                                                | Classification          | Data base | Ident. Status | m/z                     | RT                  | CCS                  | Response value | Response value | Response value | Response value | Response value  | Response value  |
|----------------------------------------------------------|-------------------------|-----------|---------------|-------------------------|---------------------|----------------------|----------------|----------------|----------------|----------------|-----------------|-----------------|
|                                                          |                         |           |               |                         | [min]               | [Å <sup>2</sup> ]    | Drinking water | Process water  | Raw water      | Surface water  | WWTP effluent 1 | WWTP effluent 2 |
| Melperone                                                | pharmaceutical          | 1         | t             | 264.1757                | 7.8                 | 163.4                | -              | -              | -              | -              | 4947            | 1442            |
| Mirtazapine                                              | pharmaceutical          | 1         | t             | 266.1655                | 7.25                | 160.4                | -              | -              | -              | -              | 5053            | 4051            |
| Nalidixic acid                                           | pharmaceutical          | 1         | t             | 233.0915 <sup>*)1</sup> | 8.2 <sup>*)1</sup>  | 149.8 <sup>*)1</sup> | -              | -              | -              | -              | -               | 2166            |
| Nevirapine                                               | pharmaceutical          | 1         | t             | 267.1243 <sup>*)1</sup> | 8.57 <sup>*)1</sup> | 157.0 <sup>*)1</sup> | -              | -              | -              | -              | -               | 3455            |
| Pyroquilon                                               | pesticide               | 1,2       | t             | 174.0915                | 4.85                | 137.7                | -              | -              | -              | -              | 23148           | 19544           |
| Riboflavin                                               | Vitamin B2              | 1         | t             | 377.1458                | 7.24                | 186.2                | -              | -              | -              | -              | 3371            | 3038            |
| Tilidine                                                 | pharmaceutical          | 1         | t             | 274.1805                | 7.67                | 162.1                | -              | -              | -              | 285            | 2535            | 2705            |
| Triamterene                                              | pharmaceutical          | 1         | t             | 254.1148                | 7.04                | 156.4                | -              | -              | -              | -              | 8760            | 11009           |
| Verapamil                                                | pharmaceutical          | 1         | i             | 455.2903                | 9.43                | 210.9                | -              | -              | -              | -              | 3169            | 1444            |
| Mexacarbate                                              | pesticide               | 1,2       | t             | 223.1434 <sup>*)1</sup> | 7.26 <sup>*)1</sup> | 155.5 <sup>*)1</sup> | -              | -              | -              | -              | -               | 544             |
| Thiabendazole                                            | pesticide               | 1,2       | t             | 202.0447                | 6.71                | 139                  | -              | -              | -              | -              | 818             | 466             |
| 2-Ethylidene-1,5-dimethyl-3,3-diphenylpyrrolidine (EDDP) | metabolite of methadone | 1         | t             | 278.1904                | 8.92                | 165.8                | -              | -              | -              | -              | 10424           | 15383           |
| Ketamine                                                 | pharmaceutical          | 1         | t             | 238.0988                | 7.02                | 149.6                | -              | -              | -              | -              | 1469            | 4338            |
| Metoclopramide                                           | pharmaceutical          | 1         | t             | 300.1477                | 6.77                | 172.2                | -              | -              | -              | -              | 2122            | -               |
| Propafenone                                              | pharmaceutical          | 1         | t             | 342.2063                | 9.83                | 177.3                | -              | -              | -              | -              | 22554           | 34360           |
| Ranitidine                                               | pharmaceutical          | 1         | t             | 315.1483                | 5.08                | 168.6                | -              | -              | -              | -              | 5207            | 11336           |
| Zolpidem                                                 | pharmaceutical          | 1         | t             | 308.176                 | 7.84                | 177.5                | -              | -              | -              | -              | 3288            | -               |
| Ethoxyquin                                               | pesticide               | 2         | t             | 218.1545                | 7.39                | 153.8                | -              | -              | -              | -              | 264             | -               |
| Anhydroerythromycin                                      | pharmaceutical          | 3         | i             | 716.4565                | 10.29               | 269.8                | -              | -              | -              | -              | 432             | -               |

\*For alprenolol, the CCS value does not match with the CCS value from the literature (see Table S5).

<sup>\*)1</sup> m/z, retention time and CCS value were obtained from the first triplicate of the WWTP effluent 2 sample.

<sup>\*)2</sup> m/z, retention time and CCS value were obtained from the first triplicate of the surface water sample.

Table S5. Comparison of measured CCS values with reference CCS (determined with the reference standard) and CCS values from literature. The CCS error was calculated as  $\frac{CCS_{measured}-CCS^*}{CCS_{measured}}$  [2], thereby CCS\* means the CCS value of the reference standard or the CCS value obtained from literature.

| Substance           | PubChem ID | CCS sample        | CCS ref. Std.     | CCS error | CCS pesticides library | CCS error | CCS literature                                                       | CCS error             |
|---------------------|------------|-------------------|-------------------|-----------|------------------------|-----------|----------------------------------------------------------------------|-----------------------|
|                     |            | [Å <sup>2</sup> ] | [Å <sup>2</sup> ] | [%]       | [Å <sup>2</sup> ]      | [%]       | [Å <sup>2</sup> ]                                                    | [%]                   |
| Flecainide          | 3356       | 192.4             | 193.4             | -0.52     |                        |           | 192.2 <sup>(b)</sup>                                                 | 0.10                  |
| Amisulpride         | 2159       | 192.5             | 194.1             | -0.83     |                        |           | 193.1 <sup>(b)</sup>                                                 | -0.31                 |
| Clindamycin         | 446598     | 201.9             | 203.3             | -0.69     |                        |           | 202.5 <sup>(a)</sup>                                                 | -0.29                 |
| Fenoterol           | 3343       | 168.8             |                   |           |                        |           | 171.1 <sup>(a)</sup>                                                 | -1.34                 |
| Fexofenadine        | 3348       | 226.5             | 227.2             | -0.31     |                        |           | 226.9 <sup>(b)</sup>                                                 | -0.18                 |
| Melamine            | 7955       | 124.2             | 123.3             | 0.72      |                        |           |                                                                      |                       |
| Oxcarbazepine       | 34312      | 154.6             |                   |           |                        |           | 153.8 <sup>(b)</sup>                                                 | 0.52                  |
| Sulfapyridine       | 5336       | 152.9             |                   |           |                        |           | 152.7 <sup>(a)</sup><br>150.8 <sup>(b)</sup><br>154.6 <sup>(c)</sup> | 0.13<br>1.37<br>-1.11 |
| Sulpiride           | 5355       | 184.7             | 186.4             | -0.92     |                        |           | 184.3 <sup>(b)</sup>                                                 | 0.22                  |
| Tapentadol          | 9838022    | 152.2             |                   |           |                        |           | 152.1 <sup>(b)</sup>                                                 | 0.07                  |
| Alprenolol          | 2119       | 166.8             |                   |           |                        |           | 159.5 <sup>(b)</sup>                                                 | 4.38                  |
| Amitriptyline       | 2160       | 166.8             |                   |           |                        |           | 167.2 <sup>(b)</sup>                                                 | -0.24                 |
| Cetirizine          | 2678       | 200.3             |                   |           |                        |           | 200.8 <sup>(b)</sup>                                                 | -0.25                 |
| Citalopram          | 2771       | 180.1             |                   |           |                        |           | 180.1 <sup>(b)</sup>                                                 | 0.00                  |
| Clopidogrel         | 60606      | 168.1             |                   |           |                        |           | 168.7 <sup>(a)</sup>                                                 | -0.33                 |
| Doxepine            | 3158       | 163.5             |                   |           |                        |           | 164.3 <sup>(b)</sup>                                                 | -0.49                 |
| Melperone           | 15387      | 163.4             |                   |           |                        |           | 163.5 <sup>(b)</sup>                                                 | -0.06                 |
| Mirtazapine         | 4205       | 160.4             |                   |           |                        |           | 161.0 <sup>(b)</sup>                                                 | -0.37                 |
| Nalidixic acid      | 4421       | 149.8             |                   |           |                        |           | 145.8 <sup>(a)</sup><br>148.0 <sup>(c)</sup>                         | 2.70<br>1.20          |
| Pyroquilon          | 91665      | 137.7             |                   |           | 136.0                  | 1.23      |                                                                      |                       |
| Verapamil           | 2520       | 210.9             | 208.8             | 1.00      |                        |           | 210.2 <sup>(a)</sup>                                                 | 0.33                  |
| Mexacarbate         | 9414       | 155.5             |                   |           | 155.6                  | -0.04     |                                                                      |                       |
| Thiabendazole       | 5430       | 139.0             |                   |           | 138.2                  | 0.57      | 137.4 <sup>(a)</sup><br>141.7 <sup>(c)</sup>                         | 1.12<br>-1.94         |
| Ketamine            | 3821       | 149.6             |                   |           |                        |           | 148.8 <sup>(a)</sup><br>149.2 <sup>(b)</sup>                         | 0.51<br>0.27          |
| Metoclopramide      | 4168       | 172.2             |                   |           |                        |           | 173.1 <sup>(a)</sup><br>173.2 <sup>(b)</sup>                         | -0.51<br>-0.58        |
| Propafenone         | 4932       | 177.3             |                   |           |                        |           | 178.5 <sup>(b)</sup>                                                 | -0.68                 |
| Zolpidem            | 5732       | 177.5             |                   |           |                        |           | 177.2 <sup>(b)</sup>                                                 | 0.17                  |
| Ethoxyquin          | 3293       | 153.8             |                   |           | 153.8                  | 0.02      | 154.5 <sup>(a)</sup>                                                 | -0.42                 |
| Anhydroerythromycin | 71313417   | 269.8             | 269.2             | 0.22      |                        |           |                                                                      |                       |

<sup>(a)</sup> Reference of CCS value: Celma et al. 2020 [3]

<sup>(b)</sup> Reference of CCS value: Mollerup et al. 2018 [4]

<sup>(c)</sup> Reference of CCS value: Tejada-Casado et al. 2018 [5]

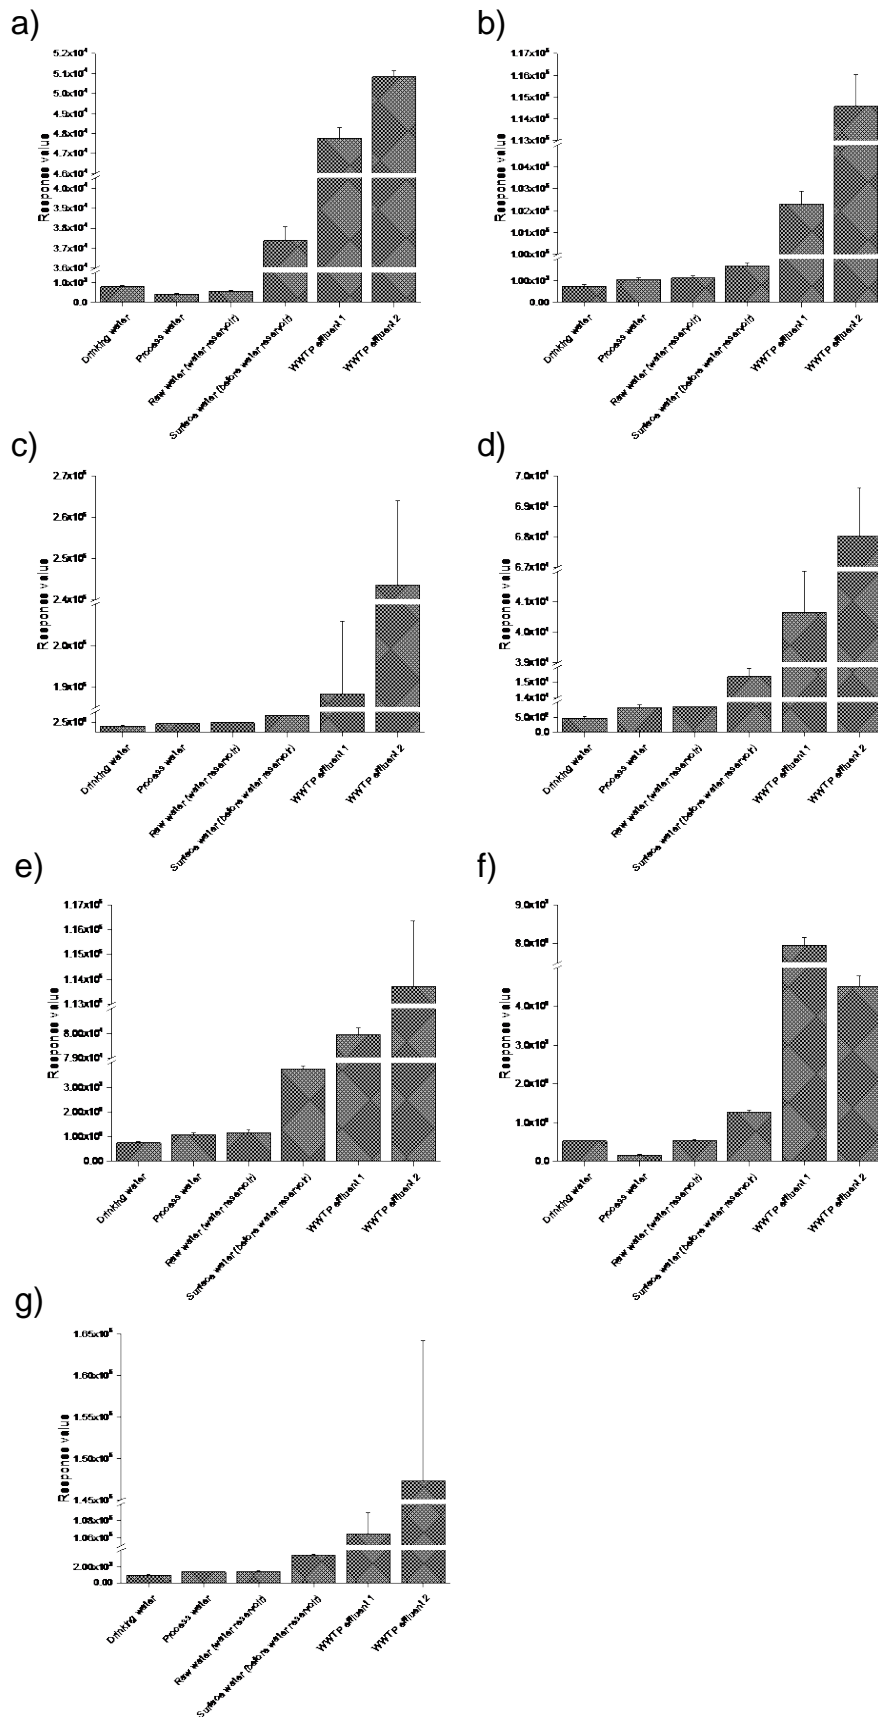

Figure S2. Representation of detected response values for a) feature 1, b) feature 2, c) feature 3, d) feature 4, e) feature 5, f) feature 6 and g) feature 7 in ESI+ mode.

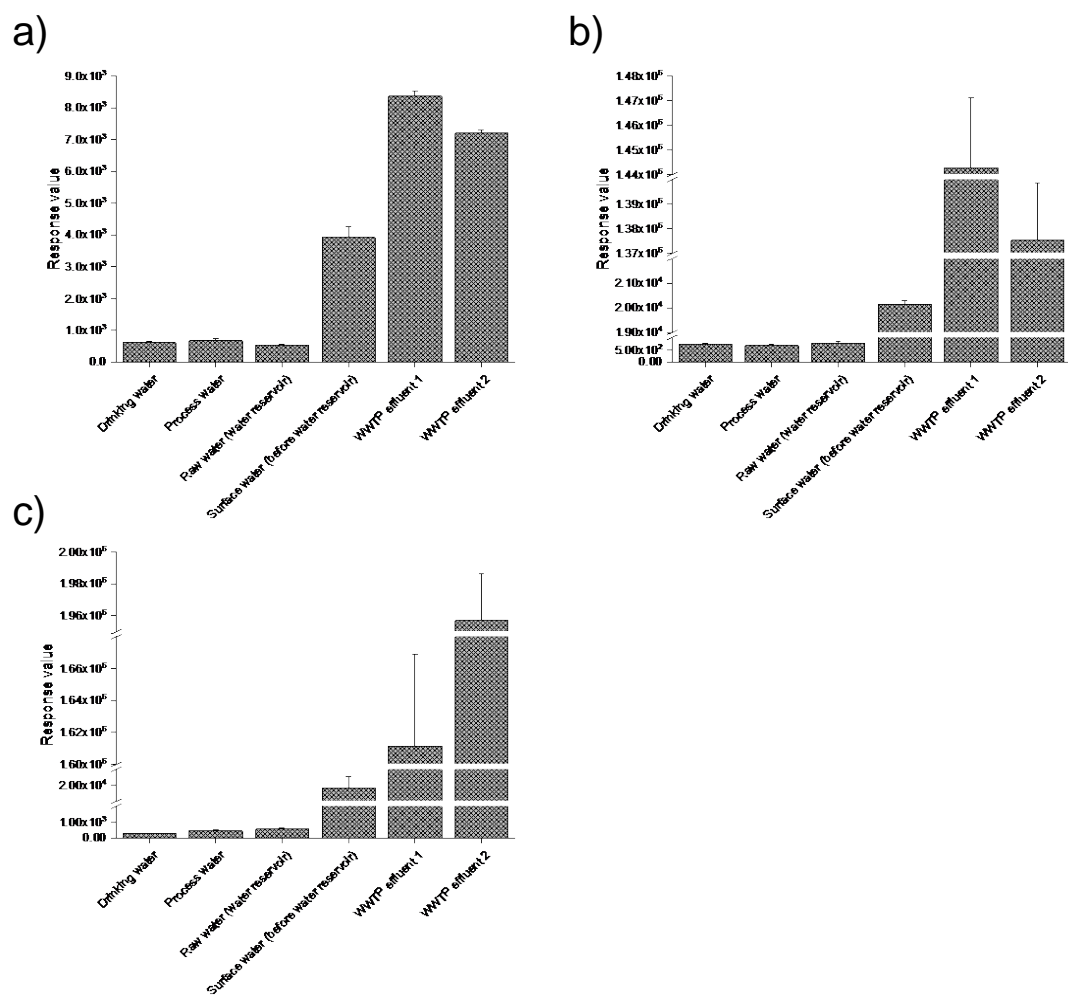

Figure S3. Representation of detected response values for a) feature 1, b) feature 2 and c) feature 3 in ESI- mode.

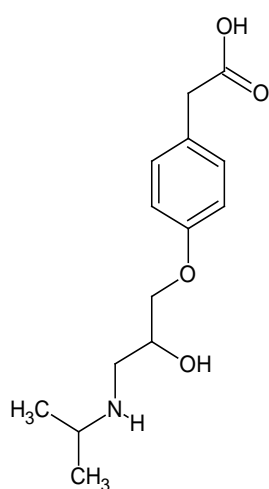

Figure S4. Chemical structure of metoprolol acid/atenolol acid.

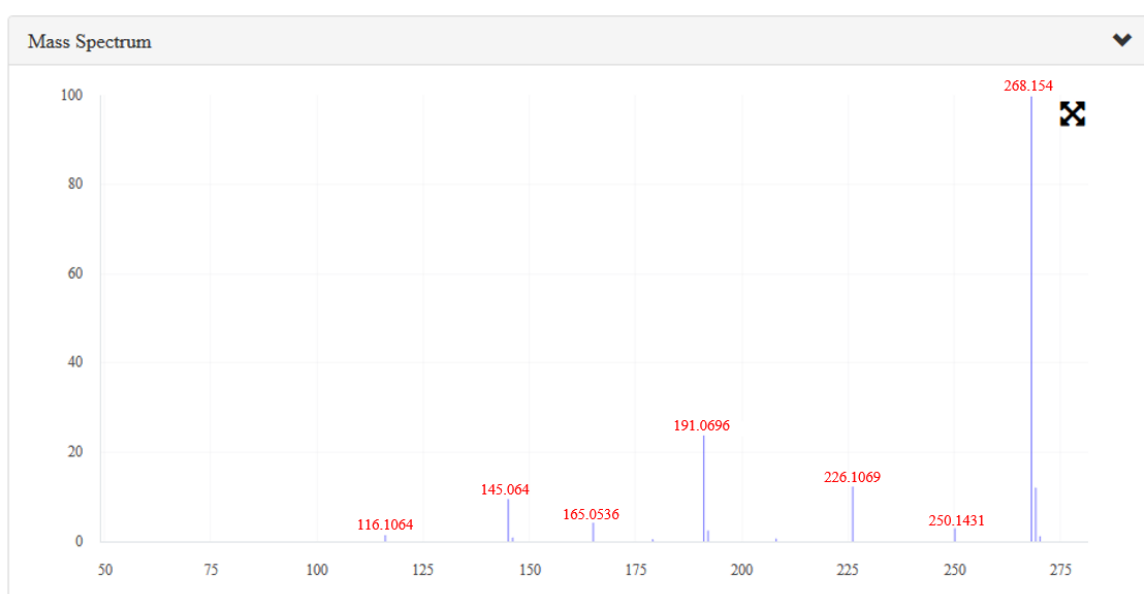

Figure S5. Fragment ion spectrum for metoprolol acid/atenolol acid obtained from PubChem.org [6].

Table S6. Calculations for the Kendrick mass defect plot according to Thurman et al. [7]. For the calculation of the Kendrick mass, the Kendrick mass scaling factor of 0.999 404 559 was calculated ( $44.0000/44.0262 = 0.999\ 404\ 559$ ) and this factor was multiplied with the measured  $m/z$  values. The nominal Kendrick mass means the Kendrick mass nearest integer value [8]. Afterwards, the Kendrick mass defect was calculated by the subtraction of the nominal Kendrick mass with the Kendrick mass.

| $m/z$    | Molecular formula<br>(all as $[M+H]^+$ ions)                   | Kendrick mass | Nominal Kendrick mass | Kendrick mass defect |
|----------|----------------------------------------------------------------|---------------|-----------------------|----------------------|
| 247.1153 | C <sub>9</sub> H <sub>17</sub> F <sub>3</sub> O <sub>4</sub>   | 246.9682      | 247.0000              | 0.0318               |
| 291.1416 | C <sub>11</sub> H <sub>21</sub> F <sub>3</sub> O <sub>5</sub>  | 290.9682      | 291.0000              | 0.0318               |
| 335.1679 | C <sub>13</sub> H <sub>25</sub> F <sub>3</sub> O <sub>6</sub>  | 334.9684      | 335.0000              | 0.0316               |
| 379.1940 | C <sub>15</sub> H <sub>29</sub> F <sub>3</sub> O <sub>7</sub>  | 378.9682      | 379.0000              | 0.0318               |
| 423.2203 | C <sub>17</sub> H <sub>33</sub> F <sub>3</sub> O <sub>8</sub>  | 422.9683      | 423.0000              | 0.0317               |
| 467.2468 | C <sub>19</sub> H <sub>37</sub> F <sub>3</sub> O <sub>9</sub>  | 466.9685      | 467.0000              | 0.0315               |
| 511.2727 | C <sub>21</sub> H <sub>41</sub> F <sub>3</sub> O <sub>10</sub> | 510.9683      | 511.0000              | 0.0317               |

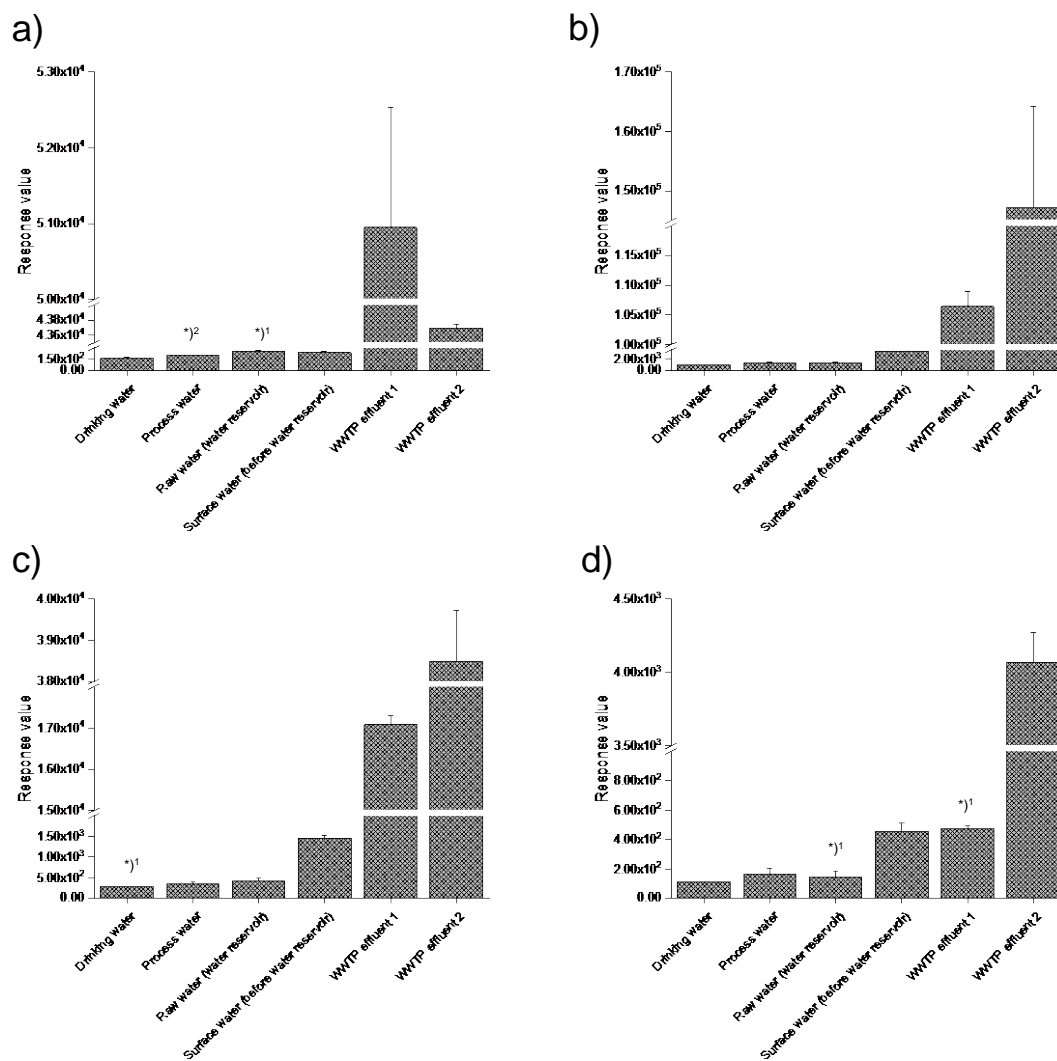

Figure S6. Representation of detected response values for a)  $m/z$  247.1153, b) 379.1940, c) 467.2468 and d) 511.2727. <sup>\*)1</sup> means that only in two of three replicate signals were detected and <sup>\*)2</sup> means that in only one of three replicates a signal was detected.

Table S7. Molecular formulas for the features, included in the homologous series. The i-fit confidence is indicated in brackets.

| $m/z$    | Molecular formula for the $[M+Na]^+$ adduct |
|----------|---------------------------------------------|
| 247.1153 | C10H23FP2 (83%)                             |
| 291.1416 | C11H24O7 (70%)                              |
|          | C12H27FOP2 (24%)                            |
| 335.1679 | C13H28O8 (100%)                             |
|          | C15H32O9 (50%)                              |
| 379.1940 | C15H31F2N2O3 (22%)                          |
|          | C16H35FO3P2 (14%)                           |

---

| <i>m/z</i> | Molecular formula for the [M+Na] <sup>+</sup> adduct |
|------------|------------------------------------------------------|
| 423.2203   | C17H36O10 (31%)                                      |
|            | C18H39FO4P2 (18%)                                    |
|            | C17H35F2N2O4P (16%)                                  |
|            | C12H33N8O5P (13%)                                    |
| 467.2468   | C14H37N8O6P (91%)                                    |
| 511.2727   | C24H42F5O2P (15%)                                    |
|            | C9H33FN20OS (11%)                                    |

---

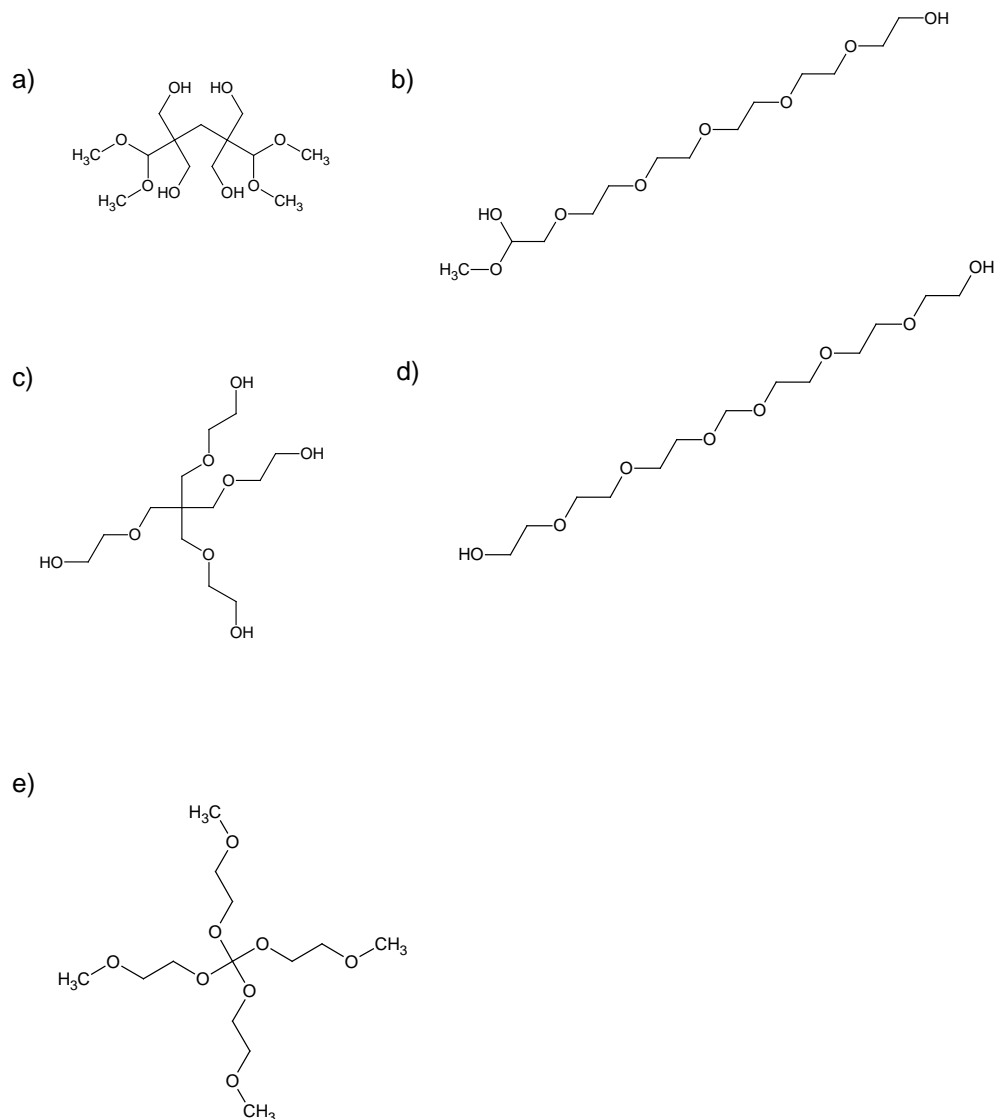

Figure S7. Chemical structures of a) 2,4-Bis(dimethoxymethyl)-2,4-bis(hydroxymethyl)-1,5-pentanediol, b) 2,5,8,11,14,17-Hexaoxonadecane-3,19-diol, c) 2-{3-(2-Hydroxyethoxy)-2,2-bis[(2-hydroxyethoxy)methyl]propoxy}ethanol, d) 3,6,9,11,14,17-Hexaoxonadecane-1,19-diol and e) 6,6-Bis(2-methoxyethoxy)-2,5,7,10-tetraoxaundecane.

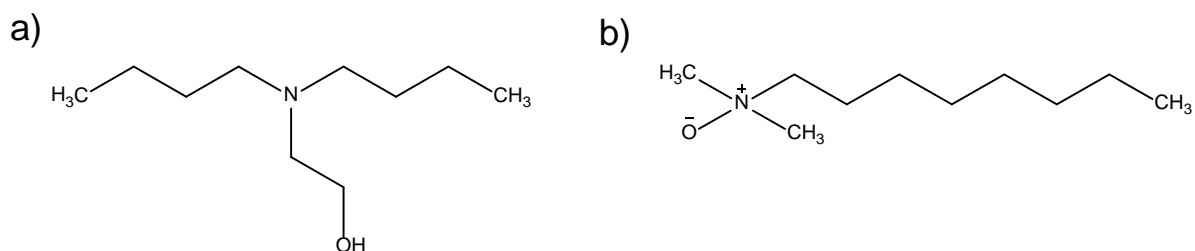

Figure S8. Chemical structures of a) N,N-Dibutylethanolamine and b) N,N-Dimethyloctylamine-N-oxide.



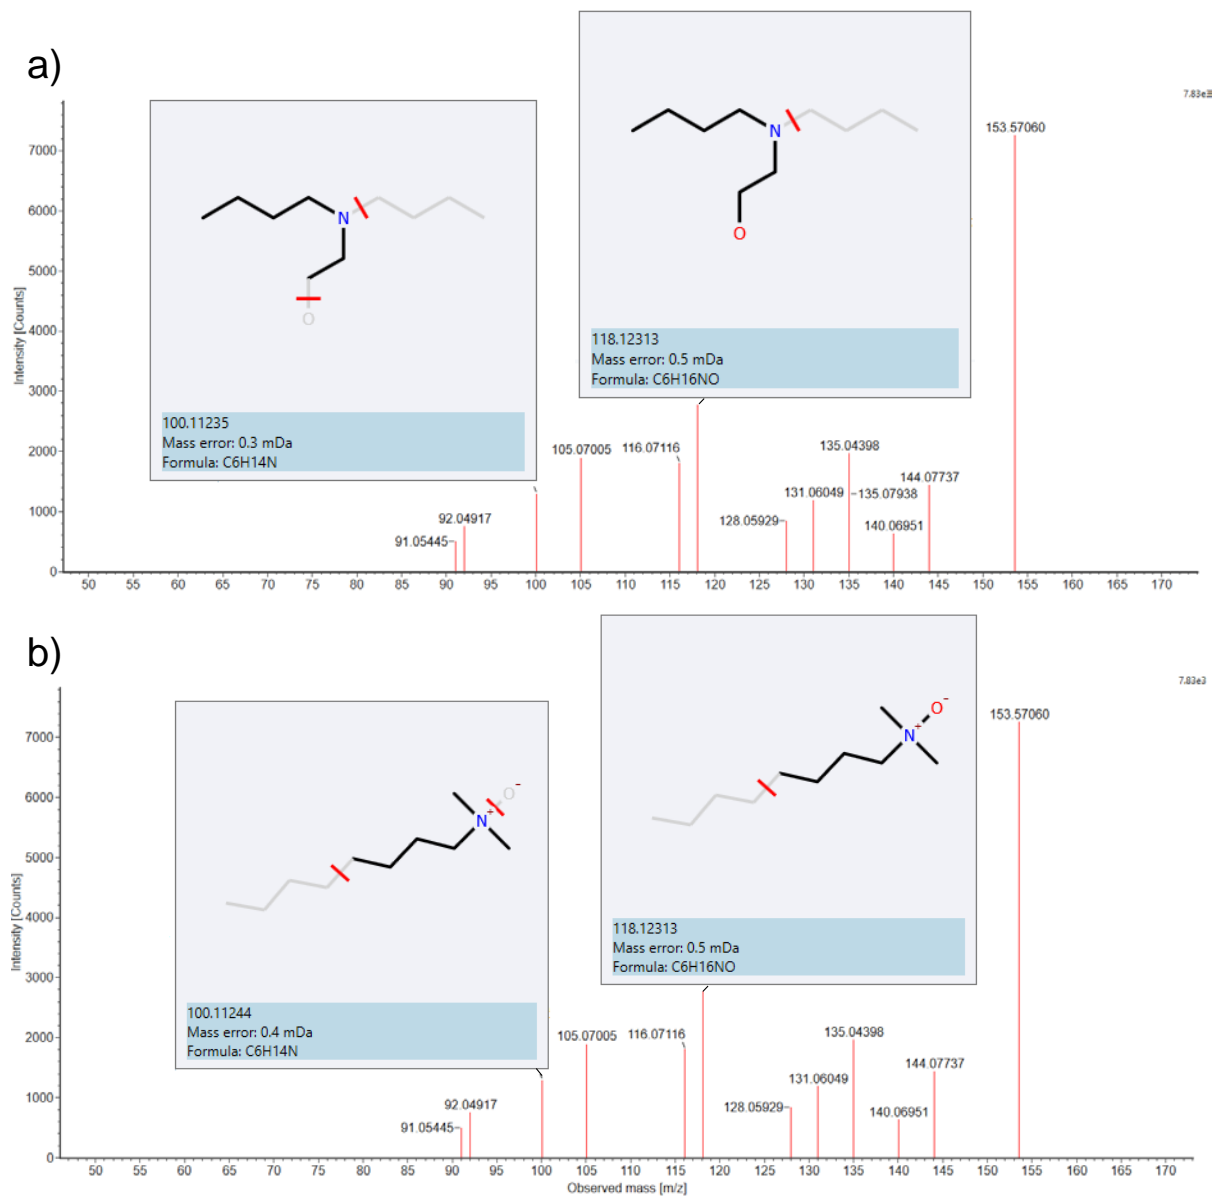

Figure S9. Comparison of measured fragment ion spectra for feature 6 in WWTP effluent 1 with in-silico fragmentation of a) N,N-Dibutylethanolamine and b) N,N-Dimethyloctylamine-N-oxide.

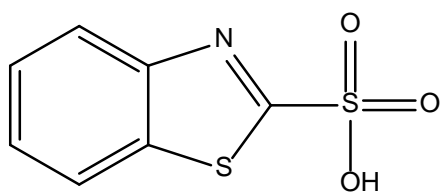

Figure S10. Chemical structure of 1,3-benzothiazole-2-sulfonic acid.

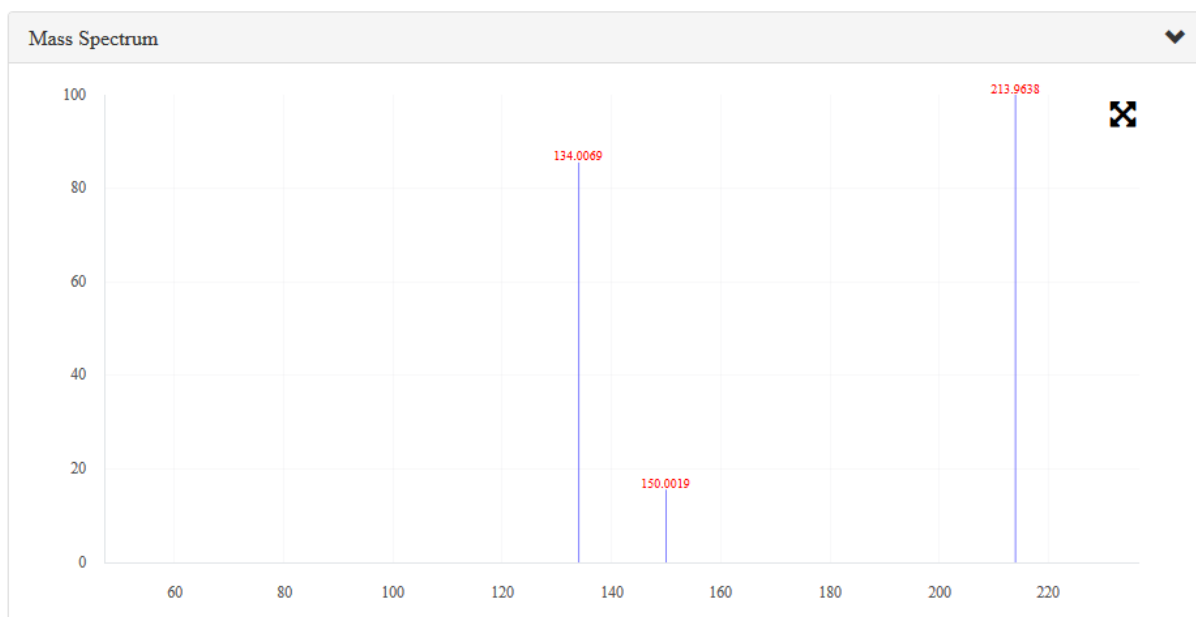

Figure S11. Fragment ion spectrum obtained by PubChem.org [9] for 1,3-benzothiazole-2-sulfonic acid.

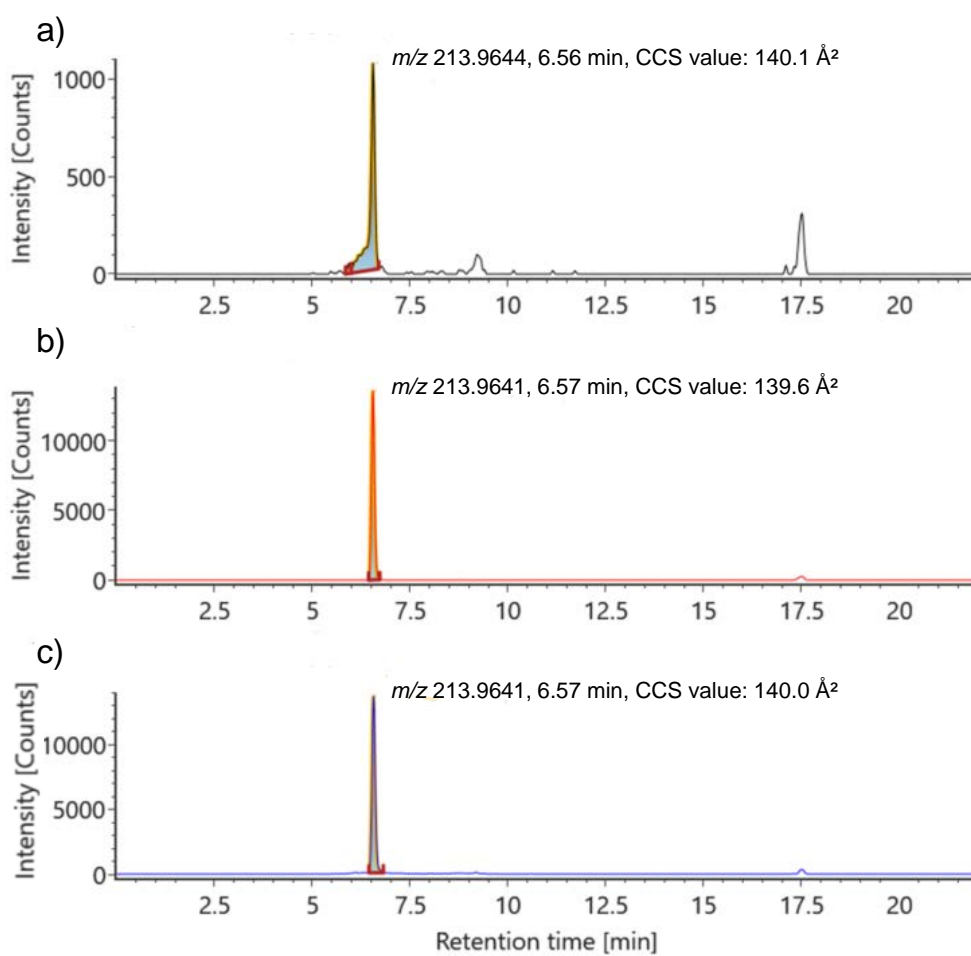

Figure S12. Extracted ion chromatograms of 1,3-benzothiazole-2-sulfonic acid for a) the drinking water sample, b) the WWTP effluent 2 sample and c) for the reference standard (500 ng/L) in a 30 ppm mass window.

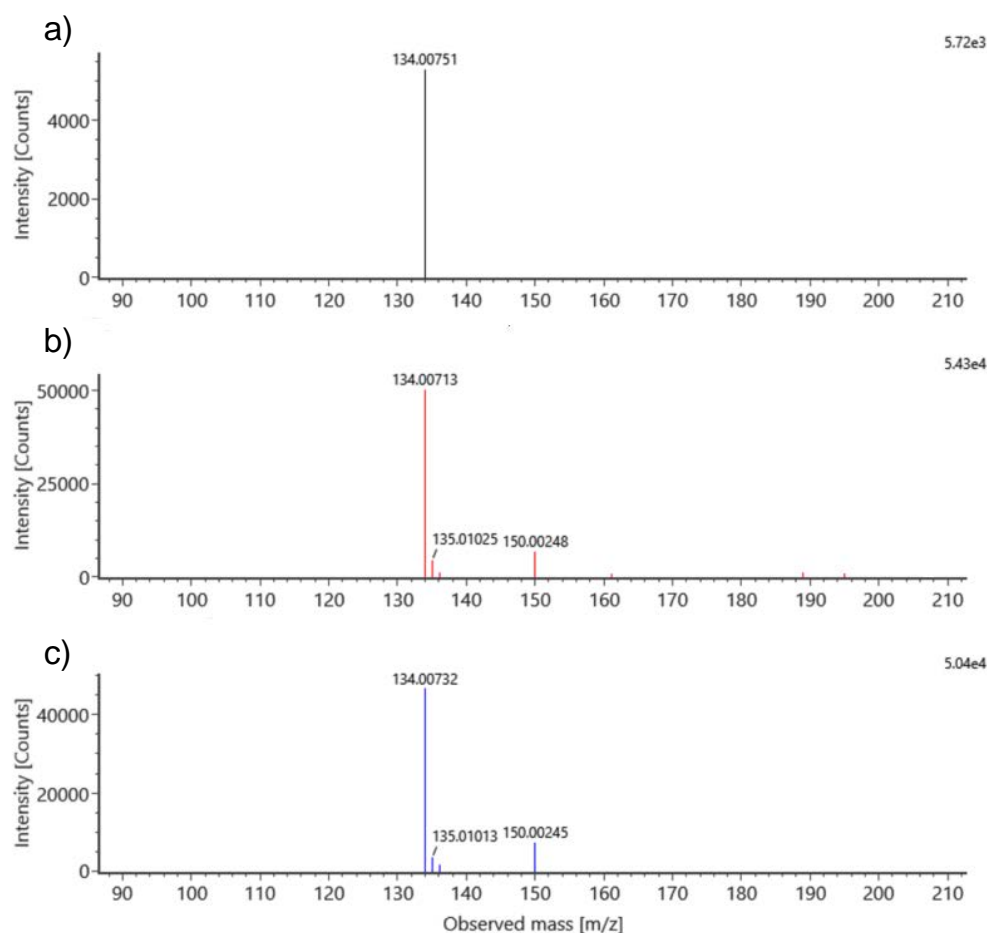

Figure S13. Fragment ion spectra of 1,3-benzothiazole-2-sulfonic acid for a) the drinking water sample, b) the WWTP effluent 2 sample and c) for the reference standard (500 ng/L). Spectra were recorded by a collision energy ramp from 15 eV to 40 eV from the precursor  $m/z$  213.9643 using the HDMS<sub>e</sub> scan mode.

## References

- [1] Wode F, van Baar P, Dünbier U, Hecht F, Taute T, Jekel M, Reemtsma T. Search for over 2000 current and legacy micropollutants on a wastewater infiltration site with a UPLC-high resolution MS target screening method. *Water Res.* 2015;69:274-283.
- [2] Gosciny S, McCullagh M, Far J, De Pauw E, Eppe G. Towards the use of ion mobility mass spectrometry derived collision cross section as a screening approach for unambiguous identification of targeted pesticides in food. *Rapid Commun. Mass Spectrom.* 2019;33:34-48.
- [3] Celma A, Sancho JV, Schymanski EL, Fabregat-Safont D, Ibáñez M, Goshawk J, Barkowitz G, Hernández F, Bijlsma L. Improving target and suspect screening high-

resolution mass spectrometry workflows in environmental analysis by ion mobility separation. *Environ. Sci. Technol.* 2020;54:15120-15131.

[4] Mollerup CB, Mardal M, Dalsgaard PW, Linnet K, Barron LP. Prediction of collision cross section and retention time for broad scope screening in gradient reversed-phase liquid chromatography-ion mobility-high resolution accurate mass spectrometry. *J. Chromatogr. A* 2018;1542: 82-88.

[5] Tejada-Casado C, Hernández-Mesa M, Monteau F, Lara FJ, del Olmo-Iruela M, García-Campaña AM, Le Bizec B, Dervilly-Pinela G. Collision cross section (CCS) as a complementary parameter to characterize human and veterinary drugs. *Anal. Chim. Acta* 2018;1043:52-63.

[6] PubChem database: <https://pubchem.ncbi.nlm.nih.gov/compound/Metoprolol-acid#section=Mass-Spectrometry>

Accessed on February 4, 2019.

[7] Thurman EM, Ferrer I, Blotevogel J, Borch T. Analysis of hydraulic fracturing flowback and produced waters using accurate mass: identification of ethoxylated surfactants. *Anal. Chem.* 2014;86:9653-9661.

[8] Gross J. *Massenspektrometrie: Ein Lehrbuch*. First edition, Springer-Verlag, Berlin, Heidelberg, 2013, p. 116.

[9] PubChem database: <https://pubchem.ncbi.nlm.nih.gov/compound/Benzothiazole-2-sulfonic-acid>

Accessed on February 4, 2019
